# Supplementary material
Source: PubMed Central journal article supplement (PMC10012039)
Supplement: jamapediatr-e230026-s001.pdf [file jamapediatr-e230026-s001.pdf]

## Data Sharing Statement

Agawu. Patterns of Change in Race Category in the Electronic Medical Record of a Pediatric Population. *JAMA Pediatr*. Published March 13, 2023. doi:10.1001/jamapediatrics.2023.0026

### Data

**Data available:** No
